# Supplementary material for: Identification of Archaea-specific chemotaxis proteins which interact with the flagellar apparatus
Source: PubMed Central journal article supplement (PMC2666748; doi:10.1186/1471-2180-9-56), 2009-03-16
Supplement: 1471-2180-9-56-S4.pdf [file 1471-2180-9-56-S4.pdf]

Results of computer-based cell-tracking experiments.

| Clone              |   | # Cells | # Reversals | % Reversals | $P_l$ (%) | $P_u$ (%) |
|--------------------|---|---------|-------------|-------------|-----------|-----------|
| S9                 | O | 256     | 183         | 71.48       | 65.46     | 76.85     |
|                    | B | 162     | 111         | 68.52       | 60.69     | 75.45     |
|                    | S | 216     | 51          | 23.61       | 18.23     | 29.95     |
| R1                 | O | 127     | 100         | 78.74       | 70.41     | 85.29     |
|                    | B | 100     | 81          | 81.00       | 71.67     | 87.89     |
|                    | S | 74      | 7           | 9.46        | 4.21      | 19.09     |
| S9 $\Delta$ 1 C1   | O | 166     | 11          | 6.63        | 3.52      | 11.84     |
|                    | B | 153     | 4           | 2.61        | 0.84      | 6.98      |
|                    | S | 201     | 3           | 1.49        | 0.39      | 4.65      |
| S9 $\Delta$ 1 C2   | O | 39      | 6           | 15.38       | 6.41      | 31.21     |
|                    | B | 77      | 11          | 14.29       | 7.69      | 24.55     |
|                    | S | 201     | 20          | 9.95        | 6.33      | 15.16     |
| R1 $\Delta$ 1 C1   | O | 58      | 0           | 0.00        | 0.16      | 7.74      |
|                    | B | 58      | 9           | 15.52       | 7.77      | 27.93     |
|                    | S | 157     | 23          | 14.65       | 9.70      | 21.38     |
| R1 $\Delta$ 1 C2   | O | 118     | 22          | 18.64       | 12.30     | 27.09     |
|                    | B | 36      | 5           | 13.89       | 5.23      | 30.29     |
|                    | S | 58      | 6           | 10.34       | 4.28      | 21.84     |
| S9 $\Delta$ 2 C1   | O | 252     | 6           | 2.38        | 0.97      | 5.36      |
|                    | B | 203     | 0           | 0.00        | 0.04      | 2.32      |
|                    | S | 125     | 1           | 0.80        | 0.04      | 5.03      |
| S9 $\Delta$ 2 C2   | O | 141     | 1           | 0.71        | 0.04      | 4.48      |
|                    | B | 211     | 3           | 1.42        | 0.37      | 4.44      |
|                    | S | 408     | 5           | 1.23        | 0.45      | 3.00      |
| R1 $\Delta$ 2 C1   | O | 97      | 2           | 2.06        | 0.36      | 7.97      |
|                    | B | 95      | 2           | 2.11        | 0.37      | 8.13      |
|                    | S | 247     | 7           | 2.83        | 1.25      | 6.00      |
| R1 $\Delta$ 2 C2   | O | 148     | 2           | 1.35        | 0.23      | 5.30      |
|                    | B | 216     | 2           | 0.93        | 0.16      | 3.66      |
|                    | S | 235     | 5           | 2.13        | 0.79      | 5.17      |
| S9 $\Delta$ 4 C1   | O | 179     | 126         | 70.39       | 63.04     | 76.85     |
|                    | B | 185     | 130         | 70.27       | 63.04     | 76.64     |
|                    | S | 280     | 58          | 20.71       | 16.22     | 26.03     |
| S9 $\Delta$ 4 C2   | O | 220     | 126         | 57.27       | 50.44     | 63.85     |
|                    | B | 142     | 97          | 68.31       | 59.90     | 75.71     |
|                    | S | 191     | 54          | 28.27       | 22.12     | 35.31     |
| R1 $\Delta$ 4 C1   | O | 35      | 23          | 65.71       | 47.74     | 80.32     |
|                    | B | 21      | 16          | 76.19       | 52.45     | 90.88     |
|                    | S | 58      | 17          | 29.31       | 18.46     | 42.91     |
| S9 $\Delta$ 2-4 C1 | O | 225     | 2           | 0.89        | 0.15      | 3.52      |
|                    | B | 199     | 9           | 4.52        | 2.22      | 8.69      |
|                    | S | 331     | 14          | 4.23        | 2.42      | 7.16      |
| S9 $\Delta$ 2-4 C2 | O | 236     | 3           | 1.27        | 0.33      | 3.98      |
|                    | B | 229     | 2           | 0.87        | 0.15      | 3.46      |
|                    | S | 393     | 12          | 3.05        | 1.66      | 5.42      |
| R1 $\Delta$ 2-4 C1 | O | 110     | 5           | 4.55        | 1.69      | 10.80     |
|                    | B | 92      | 1           | 1.09        | 0.06      | 6.76      |
|                    | S | 109     | 3           | 2.75        | 0.71      | 8.43      |

$P_l$  and  $P_u$  are the limits of the 95% confidence interval. The rows O, B, and S show the results of measurements with orange light step-down, with a blue light pulse, or without stimulus (spontaneous). C1 and C2 refer to different clones of the deletion strain.
