# Supplementary material for: Identification of Archaea-specific chemotaxis proteins which interact with the flagellar apparatus
Source: PubMed Central journal article supplement (PMC2666748; doi:10.1186/1471-2180-9-56), 2009-03-16
Supplement: 1471-2180-9-56-S6.pdf [file 1471-2180-9-56-S6.pdf]

## Supplementary Material - Occurrence of *che* and *fla* genes in archaeal genomes

### *che* and *fla* genes in archaeal genomes

To have a reference for co-occurrence comparisons, an exhaustive search for orthologs of *che* and *fla* genes in all completely sequenced archaeal genomes which were published until October 2007 was done. Since homology searches using Psi-Blast were not sufficient to comprehensively identify homologs of some proteins (especially small proteins with rather low conservation like FlaC, D, E, F, and G were problematic), and did not allow the discrimination between orthologs and other homologs for other proteins (e.g. CheY and other response regulators), a combination of different methods was used for ortholog identification (see detailed description below). The resulting table of orthologs is shown in [Table S2](#).

No *che* genes were detected in any archaeal genome without *fla* and flagellin genes. In contrast, several archaeal species contain *fla* genes and flagellins, but no *che* genes, leading to the conclusion that these species are motile, but their motility is not controlled by a *che* system. *che* genes have not been detected in any crenarchaeal genome. If *che* genes were found, there was always the whole set consisting of *cheA*, *cheB*, *cheC*, *cheD*, *cheR*, *cheW*, and *cheY* present. An exception is *Methanosarcina barkeri*, which has lost the *cheC* gene (the genomic position, where *cheC* is located in the other *Methanosarcina* species still contains remnants of the N-terminus of *cheC*). Several archaeal species contain multiple copies of various *che* genes; the front-runner is *Methanospirillum hungatei* with 35 genes classified as *che* orthologs by the used method. A noteworthy finding is a CheA-CheC fusion protein detected in the genome of *M. hungatei*.

If in a crenarchaeal genome *fla* genes were identified, there were at least one flagellin, *flaG*, *flaH*, *flaI*, and *flaJ*, and usually also *flaF* (except in *Aeropyrum pernix*) present. The *flaG* gene in the sequenced strain of *Sulfolobus solfataricus* is interrupted by a transposase, but this insertion is neither stable under laboratory conditions nor is it found in a closely related strain [1]. In euryarchaeota which possess *fla* genes there is additionally always a *flaD/E* gene present. *flaD* and *flaE* genes could not be discriminated by the applied method, so they were merged into one ortholog group. Two versions of *flaD/E* genes can be distinguished: The species of the classes Methanomicrobia and Archaeoglobi code for a version of a FlaD/E protein (referred to as FlaD/E<sup>M</sup> in the following) with only low homology to the FlaD and FlaE proteins found in other euryarchaeal genomes [2, 3]. A special case is *Methanococcoides burtonii*

(class Methanomicrobia) that possesses both versions of the FlaD/E proteins, each in a complete *fla* gene region. This is an indication of lateral gene transfer (LGT) of a whole *fla* gene region. Such an LGT has also been proposed in a detailed study of the phylogenomics of the archaeal flagellum [3]. In genomes with FlaD/E<sup>M</sup> (or in the case of *Methanococcoides burtonii* the genome region with FlaD/E<sup>M</sup>), no *flaC* gene, or *flaC* domain fused to a *flaE* gene, was found. In all other euryarchaeota with *fla* genes, FlaC is either coded as separated protein, or as domain fused to an FlaD/E domain. Like the *che* genes, also the *fla* genes and flagellins are present in multiple copies in some genomes.

## Methods for identification of Che and Fla orthologs

For identification of Che and Fla orthologs in archaeal genomes, a combination of homology search, genome region analysis, and cluster analysis based on pairwise similarity was applied.

First, *che* and *fla* gene regions were identified by Psi-Blast against an archaeal protein sequence database using *H. salinarum* CheD and FlaH as queries. The database contained the predicted proteins from all complete archaeal genomes available in GenBank in October 2007, except for *Halobacterium salinarum* NRC-1, which contains the same *che* and *fla* genes as *H. salinarum* R1 [4, 5]. CheD and FlaH were chosen as queries, because a former study had demonstrated, that they are highly conserved throughout all chemotactic or motile archaea, and they have no close non-orthologues homologs, which would make result evaluation difficult (unpublished data). All hits with an e-value of  $10^{-8}$  or lower were accepted. This cut-off, however, was not critical, as there were no hits with e-values between  $10^{-10}$  and  $10^{-2}$  for CheD and  $10^{-10}$  and  $10^{-5}$  for FlaH.

Second, the genes in the neighbourhood of the identified *cheD* and *flaH* genes were examined by BlastP against the archaeal protein sequence database, and querying CDS and Pfam. Based on homology or identified domains, the genes were assigned to pools. The pools were: CheA, CheB, CheC, CheD, CheR, CheW, CheY, DUF439, FlaC, FlaD/E (FlaD and FlaE could not be distinguished), FlaF, FlaG, FlaH, FlaI, FlaJ. The examination of neighbouring genes was repeated, until on each side of the region three genes with no obvious relation to chemotaxis or flagellation were found.

Third, the pools were extended to identify homologs located apart from the main genome regions. For this, each member of a pool was used as query in a Blast search against the archaeal protein sequence database. All hits with an e-value of  $10^{-3}$  or smaller were included into the extended pools.

Fourth, the extended pools were clustered based on pairwise similarity. This was done with the CLANS application [6]. Iteration was run until movement of vertices became negligible. The cluster in which the members of the non-extended pools were found was extracted and the members considered

as the final group of orthologs. Proteins which were not included into this ortholog cluster but did also not cluster with any other proteins and had only connections to the ortholog cluster, were included into the final ortholog group as well (marked with an asterisk in [Table S2](#)). The applicability of the method was supported by the fact that in all cases the members of the non-extended pools were found in one cluster.

Table S2: *che* and *fla* genes in archaeal genomes.

|     | <i>cheA</i>   | <i>cheB</i>      | <i>cheC</i>                     | <i>cheD</i> | <i>cheR</i>               | <i>cheW</i>            | <i>cheY</i> | 439                             | <i>flaC</i>        | <i>flaD/E</i>                                      | <i>flaF</i>   | <i>flaG</i>     | <i>flaH</i>   | <i>flaI</i>   | <i>flaJ</i>   | <i>flg</i>                                              |
|-----|---------------|------------------|---------------------------------|-------------|---------------------------|------------------------|-------------|---------------------------------|--------------------|----------------------------------------------------|---------------|-----------------|---------------|---------------|---------------|---------------------------------------------------------|
| Ape |               |                  |                                 |             |                           |                        |             |                                 |                    |                                                    |               | 1901            | 1898          | 1896.1        | 1895.1        | 1905,<br>1907                                           |
| Afu | 1040          | 1041             | 1039                            | 1038        | 1037                      | 1044                   | 1042        | 1043                            |                    | 1053 <sup>M</sup>                                  | 1051          | 1052            | 1050          | 1049          | 1048          | 1054,<br>1055                                           |
| Mbo | 1336          | 1337,<br>0327*** | 1335                            | 1334        | 1581,<br>1252,<br>0327*** | 1247,<br>1579,<br>1098 | 1338        | 1339                            |                    | 1346 <sup>M</sup>                                  | 1344          | 1345            | 1343          | 1342          | 1341          | 1347,<br>1348                                           |
| Hma | 2205          | 2204             | 2193,<br>0528,<br>1258,<br>2623 | 2192        | 2206                      | 2203,<br>1484          | 2194        | 2209,<br>2213,<br>3221,<br>3231 | 2191 <sup>F</sup>  | 2191 <sup>F</sup> ,<br>1482                        | 2190          | 2187            | 2186          | 2184          | 2183          | 2198,<br>pNG1026,<br>rrnB0018*                          |
| Hsa | 2415R         | 2416R            | 2410R,<br>2414R,<br>3280R       | 2408R       | 2406R                     | 2374R,<br>2419R        | 2417R       | 2402F,<br>2404R                 | 2386R <sup>F</sup> | 2390R,<br>2386R <sup>F</sup>                       | 2385R         | 2383R,<br>4607R | 2381R         | 2380R         | 2379R         | 2397F,<br>2398F,<br>2399F,<br>2469F,<br>2470F,<br>2695F |
| Mse |               |                  |                                 |             |                           |                        |             |                                 |                    |                                                    | 1327          | 1328            | 1326          | 1325          | 1324          | 1330                                                    |
| Mbu | 0361          | 0360,<br>0399*** | 0362                            | 0363        | 0364,<br>0399***          | 0357                   | 0359        | 0358                            | 1570 <sup>F</sup>  | 0348 <sup>M</sup> ,<br>1570 <sup>F</sup> ,<br>1246 | 0350,<br>1571 | 0349,<br>1572   | 0351,<br>1573 | 0352,<br>1574 | 0353,<br>1575 | 0346,<br>0347,<br>0104                                  |
| Mja |               |                  |                                 |             |                           |                        |             | 1615*                           | 0894               | 0895,<br>0896                                      | 0897          | 0898            | 0899          | 0900          | 0901          | 0891,<br>0892,<br>0893                                  |
| MC5 | 0734          | 0733             | 0738,<br>0739                   | 0735        | 0737                      | 0732                   | 0740        | 0741                            | 1738               | 1737,<br>1736                                      | 1735,<br>1332 | 1734            | 1733          | 1732          | 1731          | 1739,<br>1740,<br>1741,<br>1742                         |
| MC7 | 0174          | 0173             | 0178,<br>0179                   | 0175        | 0177                      | 0172                   | 0180        | 0181                            | 0942               | 0943,<br>0944                                      | 0945,<br>1343 | 0946            | 0947          | 0948          | 0949          | 0938,<br>0939,<br>0940,<br>0941                         |
| MS2 | 0927          | 0926             | 0931,<br>0932                   | 0928        | 0930                      | 0925                   | 0933        | 0934                            | 1669               | 1670,<br>1671                                      | 1672,<br>0342 | 1673            | 1674          | 1675          | 1676          | 1666,<br>1667,<br>1668                                  |
| Mma | 0943,<br>0238 | 0944,<br>2125**  | 0942                            | 0941        | 1545                      | 1544,<br>0240          | 0945        | 0946                            |                    | 0953 <sup>M</sup>                                  | 0951          | 0952            | 0950          | 0949          | 0948          | 0962,<br>0963,<br>1375,<br>1374                         |

Table S2: (continued)

|      | <b>cheA</b>                          | <b>cheB</b>                           | <b>cheC</b>                                            | <b>cheD</b>   | <b>cheR</b>                           | <b>cheW</b>                                                                                                                                   | <b>cheY</b>                                                                                                                                   | <b>439</b>      | <b>flaC</b>                   | <b>flaD/E</b>                            | <b>flaF</b>   | <b>flaG</b>                      | <b>flaH</b>   | <b>flaI</b>   | <b>flaJ</b>   | <b>flg</b>                               |
|------|--------------------------------------|---------------------------------------|--------------------------------------------------------|---------------|---------------------------------------|-----------------------------------------------------------------------------------------------------------------------------------------------|-----------------------------------------------------------------------------------------------------------------------------------------------|-----------------|-------------------------------|------------------------------------------|---------------|----------------------------------|---------------|---------------|---------------|------------------------------------------|
| Mac  | 3066,<br>0014                        | 3067,<br>0015,<br>1989***,<br>3542*** | 3065,<br>0012                                          | 3064,<br>0011 | 3063,<br>0013,<br>1989***,<br>3542*** | 3070,<br>0020                                                                                                                                 | 3068,<br>0016                                                                                                                                 | 3069            |                               | 3060 <sup>M</sup> ,<br>3078 <sup>M</sup> | 3058,<br>3080 | 3059,<br>3079                    | 3057,<br>3081 | 3056,<br>3082 | 3055,<br>3083 | 3061,<br>3062,<br>3077                   |
| Mba  | 0984                                 | 0985,<br>2183***                      |                                                        | 0982          | 0983,<br>2183***                      | 0990                                                                                                                                          | 0986,<br>3321                                                                                                                                 |                 |                               | 1969 <sup>M</sup>                        | 1967          | 1968                             | 1966          | 1965          | 1964          | 1970                                     |
| Mmz  | 0328,<br>1325                        | 0329,<br>1326                         | 0327,<br>1323                                          | 0326,<br>1322 | 0325,<br>1324                         | 0332,<br>1330                                                                                                                                 | 0330,<br>1327                                                                                                                                 | 0331            |                               | 0321 <sup>M</sup> ,<br>0417 <sup>M</sup> | 0319,<br>0415 | 0320,<br>0416                    | 0318,<br>0414 | 0317,<br>0413 | 0316,<br>0412 | 0322,<br>0323,<br>0418                   |
| Mhu  | 0110 <sup>F</sup> ,<br>0494,<br>0989 | 0109,<br>0988,<br>0952**,<br>0887**   | 0112,<br>0110 <sup>F</sup> ,<br>2685,<br>1151,<br>2682 | 0111          | 0961,<br>0992,<br>0124                | 0007,<br>2533,<br>0991,<br>2550,<br>1439,<br>1642,<br>3041,<br>1423,<br>0496,<br>0960,<br>1925,<br>0898,<br>0003,<br>2399,<br>0993*,<br>2532* | 0108,<br>0126,<br>3040,<br>2550,<br>1439,<br>1642,<br>3041,<br>1423,<br>0496,<br>0960,<br>1925,<br>0898,<br>0003,<br>2399,<br>0993*,<br>2532* | 0107            |                               | 0100 <sup>M</sup>                        | 0102          | 0101                             | 0103          | 0104          | 0105          | 3140,<br>3139,<br>1238                   |
| Mva  | 0220                                 | 0219                                  | 0257,<br>0258                                          | 0221          | 0259                                  | 0218,<br>0138                                                                                                                                 | 0256                                                                                                                                          | 0255            | 0969                          | 0970,<br>0971                            | 0972,<br>1352 | 0973                             | 0974          | 0975          | 0976          | 0966,<br>0967,<br>0968                   |
| RC-I | 571                                  | 570                                   | 572,<br>X2603                                          | 573           | 584                                   | X655,<br>X2603                                                                                                                                | 569                                                                                                                                           | 568             |                               | 512 <sup>M</sup> ,<br>510 <sup>M</sup>   | 501, 500      | 509,<br>507,<br>506,<br>505, 503 | 499           | 498           | 497           | 515, 514                                 |
| Mae  |                                      |                                       |                                                        |               |                                       |                                                                                                                                               |                                                                                                                                               |                 | 0261                          | 0262,<br>0263                            | 0264          | 0265                             | 0266          | 0267          | 0268          | 0256,<br>0257,<br>0258,<br>0259,<br>0260 |
| Nph  | 2172A                                | 2174A                                 | 2104A,<br>3118A                                        | 2106A         | 2170A                                 | 4146A                                                                                                                                         | 2102A                                                                                                                                         | 2162A,<br>2166A | 2154A <sup>F</sup> ,<br>2686A | 2154A <sup>F</sup>                       | 2094A         | 2096A,<br>2098A                  | 2156A         | 2158A         | 2160A         | 2086A,<br>2088A,<br>2090A                |
| Pab  | 1332                                 | 1331                                  | 1334,<br>1333                                          | 1335          | 1329                                  | 1027                                                                                                                                          | 1330                                                                                                                                          | 1338            | 1381                          | 1382                                     | 1383          | 1384                             | 1385          | 1386          | 1387          | 1380,<br>1379,<br>1378*,                 |
| Pfu  |                                      |                                       |                                                        |               |                                       |                                                                                                                                               |                                                                                                                                               |                 | 0336                          | 0335                                     | 0334          | 0333                             | 0332          | 0331          | 0330          | 0337,<br>0338                            |

Table S2: (continued)

|     | cheA          | cheB | cheC          | cheD | cheR | cheW | cheY | 439  | flaC | flaD/E | flaF    | flaG      | flaH | flaI | flaJ | flg                                      |
|-----|---------------|------|---------------|------|------|------|------|------|------|--------|---------|-----------|------|------|------|------------------------------------------|
| Pho | 0484          | 0483 | 0487,<br>0488 | 0490 | 0481 | 0478 | 0482 | 0494 | 0552 | 0553   | 0553.1n | 0555      | 0556 | 0557 | 0559 | 0546,<br>0548,<br>0549,<br>0550,<br>0551 |
| Sac |               |      |               |      |      |      |      |      |      |        | 1175    | 1176      | 1174 | 1173 | 1172 | 1178                                     |
| Sso |               |      |               |      |      |      |      |      |      |        | 2319    | <i>is</i> | 2318 | 2316 | 2315 | 2323                                     |
| Sto |               |      |               |      |      |      |      |      |      |        | 2521    | 2520      | 2522 | 2523 | 2524 | 2518                                     |
| Tko | 0634,<br>0635 | 0633 | 0636,<br>0637 | 0639 | 0631 | 0629 | 0632 | 0641 | 0043 | 0044   | 0045    | 0046      | 0047 | 0048 | 0049 | 0038,<br>0039,<br>0040,<br>0041,<br>0042 |
| Tac |               |      |               |      |      |      |      |      | 0554 | 0555   | 0556    | 0557a     | 0558 | 0559 | 0560 | 0553,<br>1407m                           |
| Tvo |               |      |               |      |      |      |      |      | 0608 | 0609   | 0610    | 0611      | 0612 | 0613 | 0614 | 0607,<br>1426                            |

The column 439 lists members of the protein family DUF439. The prefix of the gene identifiers was omitted, if the rest is unambiguous (e. g. 2415F instead of OE2415F). *F*: Fusion protein, belongs to two groups; *M*: Different version of FlaD/E protein found in Methanomicrobia and Archaeoglobi; \*: singleton, not included into ortholog cluster (see text); \*\*: protein with CheB domain but no response regulator domain; \*\*\*: protein containing both a CheB and a CheR domain. *is*: gene present, but interrupted by an insertion element. The species are: Ape *Aeropyrum pernix* K1, Afu *Archaeoglobus fulgidus* DSM4304, Mbo *Candidatus Methanoregula boonei* 6A8, Hma *Haloarcula marismortui* ATCC43049, Hsa *Halobacterium salinarum* R1, Mse *Metallosphaera sedula* DSM5348, Mbu *Methanococcoides burtonii* DSM6242, Mja *Methanococcus jannaschii* DSM2661, MC5 *Methanococcus maripaludis* C5, MC7 *Methanococcus maripaludis* C7, MS2 *Methanococcus maripaludis* S2, Mma *Methanoculleus marisnigri* JR1, Mac *Methanosarcina acetivorans* C2A, Mba *Methanosarcina barkeri* fusaro, Mmz *Methanosarcina mazei* Goe1, Mhu *Methanospirillum hungatei* JF-1, Mva *Methanococcus vannielii* SB, RC-I uncultured methanogenic archaeon RC-I, Mae *Methanococcus aeolicus* Nankai-3, Nph *Natronomonas pharaonis* DSM2160, Pab *Pyrococcus abyssi* GE5, Pfu *Pyrococcus furiosus* DSM3638, Pho *Pyrococcus horikoshii* OT3, Sac *Sulfolobus acidocaldarius* DSM639, Sso *Sulfolobus solfataricus* P2, Sto *Sulfolobus tokodaii* 7, Tko *Thermococcus kodakaraensis* KOD1, Tac *Thermoplasma acidophilum* DSM1728, Tvo *Thermoplasma volcanium* GSS1. Also included in the analysis, but not listed in the table, since no *che* and *fla* orthologs were detected, were: *Haloquadratum walsbyi* DSM16790, *Hyperthermus butylicus* DSM5456, *Ignicoccus hospitalis* KIN4 I, *Methanobacterium thermoautotrophicum* delta H, *Methanobrevibacter smithii* ATCC35061, *Methanocorpusculum labreanum* Z, *Methanopyrus kandleri* AV19, *Methanosaeta thermophila* PT, *Methanosphaera stadtmanae* DSM3091, *Nanoarchaeum equitans* Kin4-M, *Picrophilus torridus* DSM9790, *Pyrobaculum aerophilum* IM2, *Pyrobaculum arsenaticum* DSM13514, *Pyrobaculum calidifontis* JCM11548, *Pyrobaculum islandicum* DSM4184, *Staphylothermus marinus* F1, *Thermofilum pendens* Hrk 5.

## References

- [1] Szabó Z, Sani M, Groeneveld M, Zolghadr B, Schelert J, et al. (2007) Flagellar motility and structure in the hyperthermoacidophilic archaeon *Sulfolobus solfataricus*. *J Bacteriol* 189:4305–4309. doi: 10.1128/JB.00042-07. URL <http://dx.doi.org/10.1128/JB.00042-07>.
- [2] Ng SYM, Chaban B, Jarrell KF (2006) Archaeal flagella, bacterial flagella and type IV pili: a comparison of genes and posttranslational modifications. *J Mol Microbiol Biotechnol* 11:167–191. doi:10.1159/000094053. URL <http://dx.doi.org/10.1159/000094053>.
- [3] Desmond E, Brochier-Armanet C, Gribaldo S (2007) Phylogenomics of the archaeal flagellum: rare horizontal gene transfer in a unique motility structure. *BMC Evol Biol* 7:106. doi: 10.1186/1471-2148-7-106. URL <http://dx.doi.org/10.1186/1471-2148-7-106>.
- [4] Ng WV, Kennedy SP, Mahairas GG, Berquist B, Pan M, et al. (2000) Genome sequence of *Halobacterium* species NRC-1. *Proc Natl Acad Sci U S A* 97:12176–12181. doi:10.1073/pnas.190337797. URL <http://dx.doi.org/10.1073/pnas.190337797>.
- [5] Pfeiffer F, Schuster SC, Broicher A, Falb M, Palm P, et al. (2008) Evolution in the laboratory: The genome of *Halobacterium salinarum* strain R1 compared to that of strain NRC-1. *Genomics* 91:335–346. doi:10.1016/j.ygeno.2008.01.001. URL <http://dx.doi.org/10.1016/j.ygeno.2008.01.001>.
- [6] Frickey T, Lupas A (2004) CLANS: a Java application for visualizing protein families based on pairwise similarity. *Bioinformatics* 20:3702–3704. doi:10.1093/bioinformatics/bth444. URL <http://dx.doi.org/10.1093/bioinformatics/bth444>.
