# Supplementary material for: Identification of Archaea-specific chemotaxis proteins which interact with the flagellar apparatus
Source: Springer Nature journal article supplement (doi:10.1186/1471-2180-9-56), 2009-01-01
Supplement: Additional file 7 [file 1471-2180-9-56-s7.pdf]

Primers used in this study

| Primer                                  | Sequence                               | Restriction site |
|-----------------------------------------|----------------------------------------|------------------|
| <b>Protein interaction analysis</b>     |                                        |                  |
| OE2401F_fo                              | CACCGTGCCATCGCTGTACGGGCTGG             |                  |
| OE2401F_re                              | CGTTTTTCCGCCAGCTTCGAGATC               |                  |
| OE2402F_fo                              | CACCATGAGCGAGTCAGAGTACAAGATAG          |                  |
| OE2402F_re                              | TTCCCTCGTTGATCGCTTCGCTGGC              |                  |
| OE2404R_fo                              | CACCATGTCGGAATCAGCAATCGCAGAC           |                  |
| OE2404R_re                              | GAGGTTGACGTCCTCGATGTGTTC               |                  |
| OE2408R_fo                              | CACCGTGACGATCCGCGTTGGCGTG              |                  |
| OE2408R_re                              | AATTACGTGCACCTCGGCATC                  |                  |
| OE2417R_fo                              | CACCATGGCGAAGCAGGTCTTACTGGTC           |                  |
| OE2417R_re                              | TGCGGTGAGCACGTCCGAAATAGCG              |                  |
| OE3280R_fo                              | CACCATGAGTGCACGATCGAGCTG               |                  |
| OE3280R_re                              | CGAGAGGTCGTTGAGCAGCGAC                 |                  |
| <b>Construction of deletion mutants</b> |                                        |                  |
| OE2401F_us_fo                           | ATTCGAGGATCCGGTGAGGAAGCCTCCGCACAGG     | BamHI            |
| OE2401F_us_re                           | AAACCGCCACCAGTGGCTTAGACAGACGACAGCGAC   |                  |
| OE2401F_ds_fo                           | GTCGTCTGTCTAGGCCACTGGTGCGGTTTCAGTCGC   |                  |
| OE2401F_ds_re                           | TCCTATAAGCTTGGCGGATGCTTCACCTGTAGC      | HindIII          |
| OE2402F_us_fo                           | TTAACGGGATCCACACCAGCGCGAAGCCACG        | BamHI            |
| OE2402F_us_re                           | GGAGCAGCCCCACGATCCTCACCTACGATCGGCGCTTC |                  |
| OE2402F_ds_fo                           | GATCGTAGGTGAGGATCGTGGGGCTGCTCCCCTCG    |                  |
| OE2402F_ds_re                           | TATCGGAAGCTTCTCGCGCTCTCGCCGGGTGACC     | HindIII          |
| OE2404R_us_fo                           | TTAACGTCTAGACGTCTCCATTCTGGCCACCGAC     | XbaI             |
| OE2404R_us_re                           | TCCCCTCGGACGCCACACCCCGTATACTCAATTATAC  |                  |
| OE2404R_ds_fo                           | TGAGTATACGGGGGTGTGGCGTCCGAGGGGAGCAGCC  |                  |
| OE2404R_ds_re                           | TTAAGCGGATCCGCATCAAGGTCGACGAATCGG      | BamHI            |
| OE2402F-OE2404R_us_re                   | TGAGTATACGGGGTTCCTCACCTACGATCGGCGCTTC  |                  |
| OE2402F-OE2404R_ds_fo                   | GATCGTAGGTGAGGAACCCCGTATACTCAATTATAC   |                  |
| <b>qRT-PCR</b>                          |                                        |                  |
| RT-PCR_OE2381R_for                      | AAGTCAGCCATGAGCCAGC                    |                  |
| RT-PCR_OE2381R_rev                      | CCTCGAGGTCATAACTCAAC                   |                  |
| RT-PCR_OE2406R_for                      | GTTGCTCGACACCCTCTCG                    |                  |
| RT-PCR_OE2406R_rev                      | CTCCAGATGTCGATCGAGC                    |                  |
| RT-PCR_OE2417R_for                      | TCCGGGAGATTCTTGAGGAG                   |                  |
| RT-PCR_OE2417R_rev                      | TGTCCATCATCAGGATCC                     |                  |
